# Supplementary material for: Effect of salt reduction on iodine status assessed by 24 hour urinary iodine excretion in children and their families in northern China: a substudy of a cluster randomised controlled trial
Source: PubMed Central journal article supplement (PMC5051323; doi:10.1136/bmjopen-2016-011168), 2016-09-08
Supplement: bmjopen-2016-011168supp_tables.pdf [file bmjopen-2016-011168supp_tables.pdf]

## ONLINE SUPPLEMENT

### **Effect of salt reduction on iodine status assessed by 24h urinary iodine excretion in children and their families in northern China: a sub-study of a cluster randomised controlled trial**

Feng J He,<sup>1</sup> Yuan Ma,<sup>1,2,3</sup> Xiangxian Feng,<sup>4</sup> Wanqi Zhang,<sup>5,6</sup> Laixiang Lin,<sup>6,7</sup> Xiaohui Guo,<sup>5</sup> Jing Zhang,<sup>2</sup> Wenyi Niu,<sup>8</sup> Yangfeng Wu,<sup>2,3,9</sup>  
Graham A MacGregor<sup>1</sup>

<sup>1</sup> Wolfson Institute of Preventive Medicine, Barts and The London School of Medicine & Dentistry, Queen Mary University of London, UK.

<sup>2</sup> The George Institute for Global Health at Peking University Health Science Center, Beijing, China.

<sup>3</sup> Department of Epidemiology and Biostatistics, Peking University School of Public Health, Beijing, China.

<sup>4</sup> Changzhi Medical College, Shanxi, China.

<sup>5</sup> School of Public Health, Tianjin Medical University, Tianjin, China.

<sup>6</sup> Key Laboratory of Hormone and Development (Ministry of Health), China.

<sup>7</sup> Metabolic Diseases Hospital & Tianjin Institute of Endocrinology, Tianjin Medical University, Tianjin, China.

<sup>8</sup> Department of Social Medicine and Health Education, Peking University School of Public Health, Beijing, China.

<sup>9</sup> Peking University Clinical Research Institute, Beijing, China.

Correspondence to:

Dr. Feng J He

Wolfson Institute of Preventive Medicine, Barts and The London School of Medicine & Dentistry, Queen Mary University of London,  
Charterhouse Square, London EC1M 6BQ.

Tel: +44 (0)20 7882 6266

Fax: +44 (0)20 7882 6270

E-mail: [f.he@qmul.ac.uk](mailto:f.he@qmul.ac.uk)

Professor Wanqi Zhang

School of Public Health, Tianjin Medical University, Tianjin, China. 300070

Tel: +86 (0)22 8333 6595

Fax: +86 (0)22 8333 6608

E-mail: [wqzhang@tmu.edu.cn](mailto:wqzhang@tmu.edu.cn)

**Supplement Table 1. Baseline characteristics of the participants\***

| <b>Parameters</b>                    | <b>Control</b> | <b>Intervention</b> | <b>All</b>  |
|--------------------------------------|----------------|---------------------|-------------|
| <b>Children</b>                      |                |                     |             |
| Number of schools                    | 14             | 14                  | 28          |
| Number of children                   | 138            | 141                 | 279         |
| Boys, N (%)                          | 67 (48.6)      | 67 (47.5)           | 134 (48.0)  |
| Age (year)                           | 10.2 (0.5)     | 10.0 (0.5)          | 10.1 (0.5)  |
| Weight (kg)                          | 33.3 (7.2)     | 33.4 (7.8)          | 33.3 (7.5)  |
| Height (cm)                          | 140.7 (6.6)    | 139.2 (6.2)         | 140.0 (6.5) |
| Body mass index (kg/m <sup>2</sup> ) | 16.7 (2.7)     | 17.1 (3.2)          | 16.9 (3.0)  |
| <b>Adults</b>                        |                |                     |             |
| Number of adults                     | 275            | 278                 | 553         |
| Men, N (%)                           | 133 (48.4)     | 135 (48.6)          | 268 (48.5)  |
| Parents, N (%)                       | 208 (75.6)     | 203 (73.0)          | 411 (74.3)  |
| Grandparents, N (%)                  | 67 (24.4)      | 75 (27.0)           | 142 (25.7)  |
| Age (year)                           | 43.6 (11.8)    | 43.9 (12.5)         | 43.8 (12.2) |
| Weight (kg)                          | 66.2 (12.9)    | 66.1 (11.6)         | 66.2 (12.3) |
| Height (cm)                          | 162.8 (8.7)    | 162.4 (8.0)         | 162.6 (8.4) |
| Body mass index (kg/m <sup>2</sup> ) | 24.9 (3.6)     | 25.0 (3.4)          | 24.9 (3.5)  |

\*Data are means (SD) unless otherwise specified.

**Supplement Table 2.** Sensitivity analysis for salt and iodine intake as calculated from 24h urinary sodium and iodine excretion

| Outcome                                                   | Number of participant<br>Control<br>/Intervention | Control                |                                   | Intervention           |                                   | Adjusted difference <sup>  </sup><br>(intervention vs control) | P value |
|-----------------------------------------------------------|---------------------------------------------------|------------------------|-----------------------------------|------------------------|-----------------------------------|----------------------------------------------------------------|---------|
|                                                           |                                                   | Baseline <sup>‡</sup>  | Change from baseline <sup>‡</sup> | Baseline <sup>‡</sup>  | Change from baseline <sup>‡</sup> |                                                                |         |
| <b>Population excluding possibly incomplete 24h urine</b> |                                                   |                        |                                   |                        |                                   |                                                                |         |
| <b>Children</b>                                           |                                                   |                        |                                   |                        |                                   |                                                                |         |
| Salt (mean, 95%CI) (g/d)                                  | 138/140                                           | 7.0<br>(6.4–7.6)       | 1.2<br>(0.7–1.6)                  | 7.5<br>(6.9–8.1)       | -0.7<br>(-1.1 – -0.2)             | -1.9<br>(-2.6– -1.2)                                           | <0.0001 |
| Iodine (geometric mean, 95%CI) (µg/d)                     | 138/140                                           | 170.8<br>(155.0–188.2) | 112.9%<br>(102.7%–124.2%)         | 180.0<br>(163.6–198.1) | 95.4%<br>(86.9%–104.8%)           | -16.5%<br>(-26.9%– -4.6%)                                      | 0.008   |
| Iodine (median, IQR) (µg/d)                               | 138/140                                           | 166.5<br>(119.0–220.4) | 27.3<br>(-20.6–79.0)              | 175.4<br>(131.3–228.7) | -9.3<br>(-52.4–39.0)              |                                                                |         |
| <b>Adults</b>                                             |                                                   |                        |                                   |                        |                                   |                                                                |         |
| Salt (mean, 95%CI) (g/d)                                  | 273/275                                           | 11.6<br>(10.8–12.3)    | 0.8<br>(0.3–1.4)                  | 12.8<br>(12.1–13.6)    | -2.1<br>(-2.6–-1.6)               | -3.0<br>(-3.7– -2.2)                                           | <0.0001 |
| Iodine (geometric mean, 95%CI) (µg/d)                     | 273/275                                           | 280.7<br>(255.0–308.9) | 104.6%<br>(97.1%–112.7%)          | 298.0<br>(270.9–327.7) | 95.6%<br>(88.8%–102.9%)           | -9.5%<br>(-18.3%–0.2%)                                         | 0.055   |
| Iodine (median, IQR) (µg/d)                               | 273/275                                           | 275.7<br>(201.9–360.1) | 15.1<br>(-78.3–105.3)             | 300.5<br>(219.2–392.5) | -30.2<br>(-117.7– 90.2)           |                                                                |         |
| <b>Completers*</b>                                        |                                                   |                        |                                   |                        |                                   |                                                                |         |
| <b>Children</b>                                           |                                                   |                        |                                   |                        |                                   |                                                                |         |
| Salt (mean, 95%CI) (g/d)                                  | 135/139                                           | 6.8<br>(6.2–7.4)       | 1.2<br>(0.8–1.7)                  | 7.2<br>(6.6–7.9)       | -0.7<br>(-1.2– -0.2)              | -1.9<br>(-2.6– -1.3)                                           | <0.0001 |
| Iodine (geometric mean, 95%CI) (µg/d)                     | 135/139                                           | 162.0<br>(146.0–180.0) | 115.4%<br>(104.9%–126.9%)         | 173.5<br>(156.4–192.4) | 94.0%<br>(85.6%–103.2%)           | -19.3%<br>(-29.4%– -7.8%)                                      | 0.002   |

|                                       |         |                        |                           |                        |                         |                           |         |
|---------------------------------------|---------|------------------------|---------------------------|------------------------|-------------------------|---------------------------|---------|
| Iodine (median, IQR) (µg/d)           | 135/139 | 160.9<br>(117.7–208.1) | 27.4<br>(-18.3–76.7)      | 169.6<br>(128.5–221.6) | -13.1<br>(-54.5–37.8)   |                           |         |
| <b>Adults</b>                         |         |                        |                           |                        |                         |                           |         |
| Salt (mean, 95%CI) (g/d)              | 261/271 | 11.4<br>(10.6–12.1)    | 0.8<br>(0.2–1.3)          | 12.7<br>(11.9–13.5)    | -2.2<br>(-2.7– -1.6)    | -3.0<br>(-3.7– -2.2)      | <0.0001 |
| Iodine (geometric mean, 95%CI) (µg/d) | 261/270 | 272.1<br>(245.3–301.7) | 104.7%<br>(96.9%–113.1%)  | 292.6<br>(264.1–324.3) | 93.1%<br>(86.3%–100.4%) | -11.1%<br>(-20.1%– -1.1%) | 0.030   |
| Iodine (median, IQR) (µg/d)           | 261/270 | 261.8<br>(197.8–348.8) | 10.7<br>(-72.8–105.3)     | 297.7<br>(213.2–391.8) | -36.5<br>(-128.4– 88.9) |                           |         |
| <b>Per protocol population†</b>       |         |                        |                           |                        |                         |                           |         |
| <b>Children</b>                       |         |                        |                           |                        |                         |                           |         |
| Salt (mean, 95%CI) (g/d)              | 132/137 | 7.0<br>(6.4–7.6)       | 1.2<br>(0.7–1.7)          | 7.5<br>(6.9–8.1)       | -0.7<br>(-1.1– -0.2)    | -1.9<br>(-2.6– -1.3)      | <0.0001 |
| Iodine (geometric mean, 95%CI) (µg/d) | 132/137 | 169.5<br>(154.1–186.4) | 114.1%<br>(103.7%–125.5%) | 179.6<br>(163.5–197.2) | 95.9%<br>(87.3%–105.3%) | -16.8%<br>(-27.2%– -4.9%) | 0.007   |
| Iodine (median, IQR) (µg/d)           | 132/137 | 166.5<br>(120.3–216.8) | 27.3<br>(-20.6–79.0)      | 178.8<br>(131.3–228.7) | -9.3<br>(-52.4–39.0)    |                           |         |
| <b>Adults</b>                         |         |                        |                           |                        |                         |                           |         |
| Salt (mean, 95%CI) (g/d)              | 249/256 | 11.6<br>(10.8–12.3)    | 0.9<br>(0.3–1.4)          | 12.9<br>(12.2–13.7)    | -2.1<br>(-2.6– -1.6)    | -3.0<br>(-3.7– -2.3)      | <0.0001 |
| Iodine (geometric mean, 95%CI) (µg/d) | 249/255 | 282.4<br>(256.5–311.0) | 104.3%<br>(96.7%–112.5%)  | 296.3<br>(269.3–326.0) | 96.1%<br>(89.2%–103.6%) | -8.3%<br>(-17.3%– -1.7%)  | 0.102   |
| Iodine (median, IQR) (µg/d)           | 249/255 | 275.8<br>(203.1–360.1) | 15.1<br>(-78.3–105.3)     | 300.1<br>(218.3–391.8) | -30.2<br>(-117.7– 90.2) |                           |         |

\* Completers refer to the participants who had 24h urine collections both at baseline and end of the trial. † Per protocol population refers to completers with complete 24h urine collections. ‡ Mean and geometric mean were adjusted for stratification variables at randomisation (school location and class size). †† Adjusted for age, sex, body mass index, stratification variables at randomisation (school location and class size), and indoor and outdoor temperature.

**Supplement Table 3.** Iodine status assessed by 24h urinary iodine concentration using WHO's criteria, and median 24h urinary iodine concentration and 24h urinary iodine excretion for each category

| Urinary iodine<br>(µg/L)    | Control        |                                    |        |                |                                    |        | Intervention   |                                    |        |                |                                    |        |
|-----------------------------|----------------|------------------------------------|--------|----------------|------------------------------------|--------|----------------|------------------------------------|--------|----------------|------------------------------------|--------|
|                             | Baseline       |                                    |        | End of trial   |                                    |        | Baseline       |                                    |        | End of trial   |                                    |        |
|                             | N (%)          | Iodine (median)<br>(µg/L) (µg/24h) |        | N (%)          | Iodine (median)<br>(µg/L) (µg/24h) |        | N (%)          | Iodine (median)<br>(µg/L) (µg/24h) |        | N (%)          | Iodine (median)<br>(µg/L) (µg/24h) |        |
| <b>Children</b>             |                |                                    |        |                |                                    |        |                |                                    |        |                |                                    |        |
| <100 (Iodine deficient)     | 10<br>(7.25)   | 85.07                              | 94.93  | 10<br>(7.41)   | 84.26                              | 114.51 | 5<br>(3.55)    | 86.17                              | 89.84  | 11<br>(7.91)   | 86.65                              | 113.78 |
| 100-199 (Adequate)          | 55<br>(39.86)  | 155.60                             | 139.77 | 40<br>(29.63)  | 152.39                             | 143.31 | 54<br>(38.30)  | 156.60                             | 152.99 | 48<br>(34.53)  | 153.87                             | 125.17 |
| 200-299 (Above requirement) | 48<br>(34.78)  | 235.92                             | 172.93 | 52<br>(38.52)  | 243.06                             | 184.82 | 43<br>(30.50)  | 248.98                             | 173.10 | 41<br>(29.5)   | 238.24                             | 165.24 |
| ≥300 (Excessive)            | 25<br>(18.12)  | 430.84                             | 249.11 | 33<br>(24.44)  | 371.52                             | 279.42 | 39<br>(27.66)  | 357.28                             | 236.15 | 39<br>(28.06)  | 411.03                             | 260.88 |
| <b>ALL</b>                  | 138            | 204.55                             | 161.73 | 135            | 222.49                             | 175.98 | 141            | 225.32                             | 166.98 | 139            | 217.09                             | 154.82 |
| <b>Adults</b>               |                |                                    |        |                |                                    |        |                |                                    |        |                |                                    |        |
| <100 (Iodine deficient)     | 32<br>(11.64)  | 81.31                              | 137.25 | 38<br>(14.56)  | 72.84                              | 149.13 | 31<br>(11.19)  | 79.49                              | 140.35 | 48<br>(17.71)  | 74.71                              | 164.03 |
| 100-199 (Adequate)          | 121<br>(44.00) | 152.37                             | 240.44 | 108<br>(41.38) | 147.78                             | 246.58 | 103<br>(37.18) | 150.95                             | 281.83 | 116<br>(42.80) | 142.55                             | 250.69 |
| 200-299 (Above requirement) | 68<br>(24.73)  | 239.54                             | 280.75 | 72<br>(27.59)  | 243.17                             | 353.36 | 79<br>(28.52)  | 246.73                             | 326.61 | 56<br>(20.66)  | 240.86                             | 293.21 |
| ≥300 (Excessive)            | 54<br>(19.64)  | 372.08                             | 420.86 | 43<br>(16.48)  | 351.76                             | 460.61 | 64<br>(23.10)  | 372.21                             | 423.84 | 51<br>(18.82)  | 364.22                             | 535.18 |
| <b>ALL</b>                  | 275            | 188.78                             | 262.11 | 261            | 183.55                             | 281.33 | 277            | 209.39                             | 297.37 | 271            | 176.18                             | 258.54 |

**Supplement Table 4.** Comparison of iodine levels observed from 24h urinary iodine with that predicted from salt intake and iodine content in salt

|                                                                                                             | <b>Control</b>  |                     | <b>Intervention</b> |                     |
|-------------------------------------------------------------------------------------------------------------|-----------------|---------------------|---------------------|---------------------|
|                                                                                                             | <b>Baseline</b> | <b>End of trial</b> | <b>Baseline</b>     | <b>End of trial</b> |
| <b>Children</b>                                                                                             |                 |                     |                     |                     |
| <b>Observed from 24h urinary measurements</b>                                                               |                 |                     |                     |                     |
| Mean salt (g/d)*                                                                                            | 6.8             | 8.0                 | 7.3                 | 6.6                 |
| Median iodine (µg/d)                                                                                        | 161.7           | 176.0               | 167.0               | 154.8               |
| Iodine/salt ratio, median (µg/g)                                                                            | 23.8            | 24.4                | 25.0                | 24.9                |
| <b>Predicted iodine based on salt intake and iodine content in salt using the minimum level of 18 mg/kg</b> |                 |                     |                     |                     |
| Predicted iodine (µg/d)                                                                                     | 122.4           | 144.0               | 131.4               | 118.8               |
| Ratio (predicted/observed)                                                                                  | 0.8             | 0.8                 | 0.8                 | 0.8                 |
| <b>Adults</b>                                                                                               |                 |                     |                     |                     |
| <b>Observed from 24h urinary measurements</b>                                                               |                 |                     |                     |                     |
| Mean salt (g/d)*                                                                                            | 11.3            | 12.1                | 12.6                | 10.4                |
| Median iodine (µg/d)                                                                                        | 262.1           | 281.3               | 297.4               | 258.5               |
| Iodine/salt ratio, median (µg/g)                                                                            | 24.8            | 24.8                | 24.6                | 26.7                |
| <b>Predicted iodine based on salt intake and iodine content in salt using the minimum level of 18 mg/kg</b> |                 |                     |                     |                     |
| Predicted iodine (µg/d)                                                                                     | 203.4           | 217.8               | 226.8               | 187.2               |
| Ratio (predicted/observed)                                                                                  | 0.8             | 0.8                 | 0.8                 | 0.7                 |

\*adjusted for stratification variables at randomisation (school location and class size).
